# Supplementary material
Source: PubMed Central journal article supplement (PMC6230553)
Supplement: NIHMS990565-supplement-1.pdf [file NIHMS990565-supplement-1.pdf]

**Molecular Cell, Volume 71**

**Supplemental Information**

**$\beta$ -Hydroxybutyrate Prevents Vascular Senescence  
through hnRNP A1-Mediated Upregulation of Oct4**

**Young-min Han, Tatiana Bedarida, Ye Ding, Brian K. Somba, Qiulun Lu, Qilong Wang, Ping Song, and Ming-Hui Zou**

# Supplemental Figures

Figure S1. Related to Figure 1

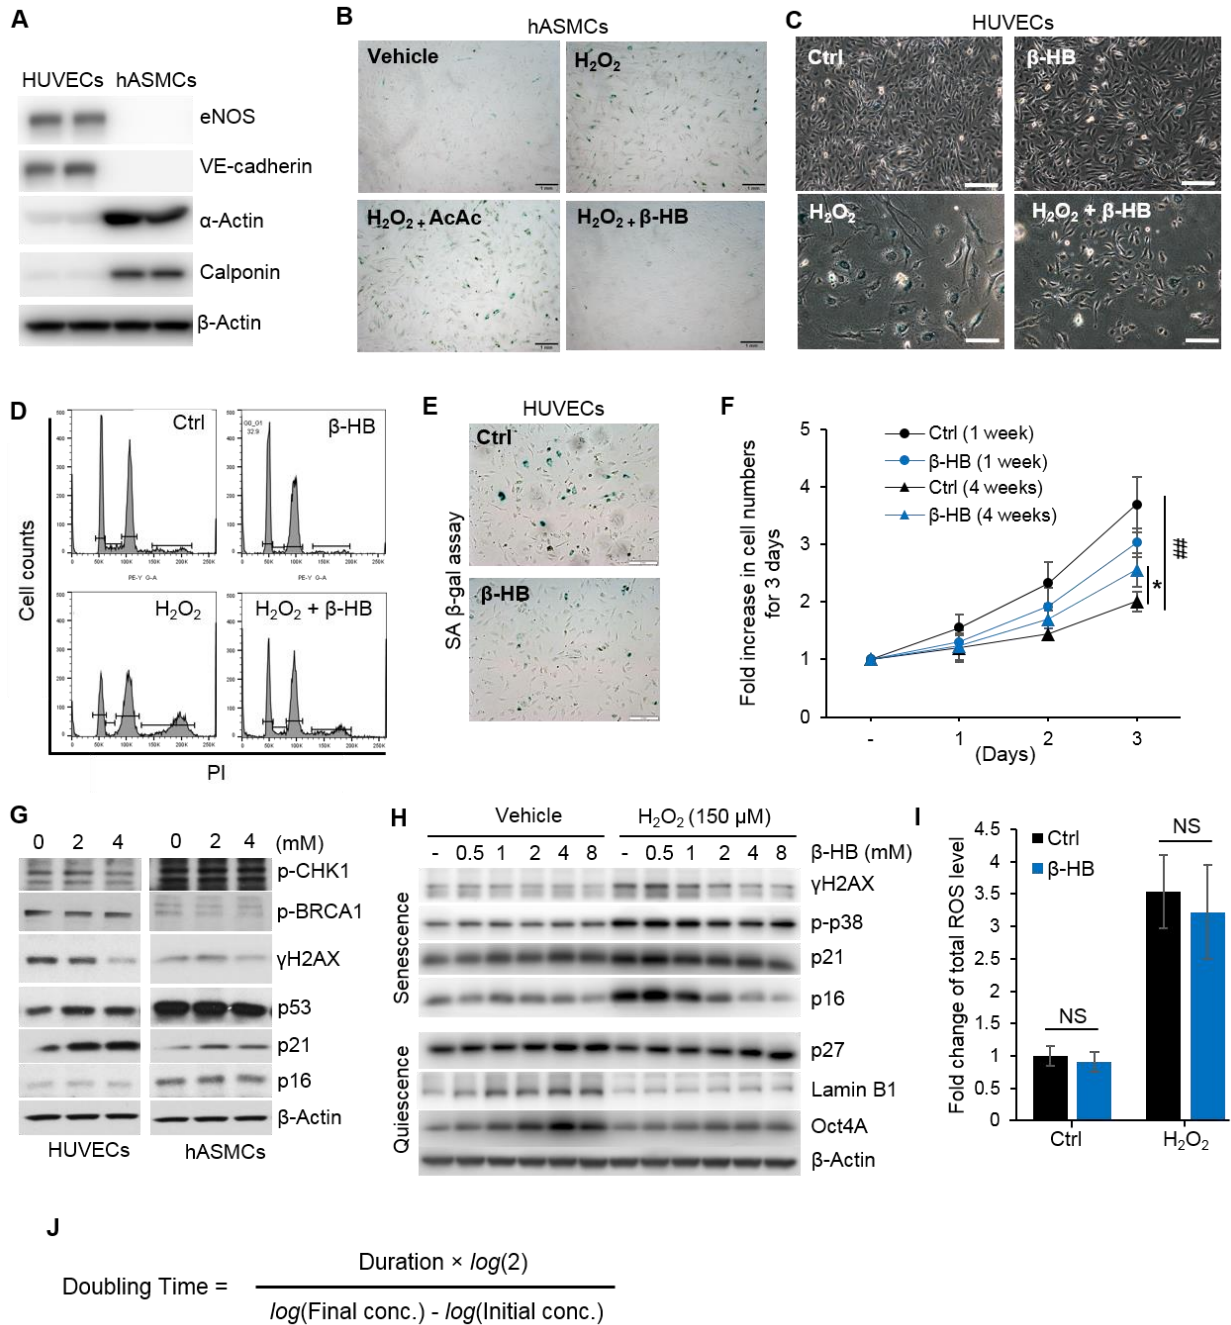

**Supplemental Figure 1 (related to Figure 1). Preventive effect of  $\beta$ -hydroxybutyrate ( $\beta$ -HB) on the cellular senescence.**

(A) Western blots for endothelial cell markers (eNOS and VE-cadherin) and smooth muscle cell markers ( $\alpha$ -Actin and Calponin) in the HUVECs and hASMCs. n = 2.

(B) Representative image of senescence-associated  $\beta$ -galactosidase (SA  $\beta$ -gal) activity assay of hASMCs after hydrogen peroxide ( $H_2O_2$ , 150  $\mu$ M, 3 days) stimulation. Cells were co-treated with acetoacetate (AcAc, 4 mM) or  $\beta$ -hydroxybutyrate ( $\beta$ -HB, 4 mM) for 3 days. Scale bar, 100  $\mu$ m. n = 3.

(C) Morphological change of HUVECs after  $H_2O_2$  (150  $\mu$ M, 3 days) stimulation. Cells were co-treated with or without  $\beta$ -HB (4 mM, 3 days). Scale bar, 100  $\mu$ m. n = 3.

(D) Cell cycle distribution of HUVECs after  $\beta$ -HB (4 mM) treatment for 3 days with or without  $H_2O_2$  (150  $\mu$ M). Cells were analyzed by flow cytometry after propidium iodide (PI) staining, based on 10,000 cells. n = 3

(E) Representative images of SA  $\beta$ -gal activity assay of HUVECs with or without  $\beta$ -HB treatment (4 mM) for 4 weeks. n = 3.

(F) HUVECs were maintained with or without  $\beta$ -HB (4 mM) treatment for 1 week or 4 weeks. After treatment, proliferation of HUVECs was analyzed by counting the cell numbers for 3 days. \*p < 0.05, Ctrl (4 weeks) vs.  $\beta$ -HB (4 weeks), ##p < 0.01 Ctrl (1 week) vs. Ctrl (4 weeks). n = 3.

(G) Representative Western blots for DNA repair signaling (p-CHK1 and p-BRCA1), DNA damage ( $\gamma$ H2AX) and cell cycle regulatory proteins (p53, p21 and p16) in HUVECs or hASMCs after  $\beta$ -HB treatment (2-4 mM). n = 3.

(H) Representative Western blots for senescence ( $\gamma$ H2AX, p-p38, p21, and p16) and quiescence (p27, Lamin B1, and Oct4A) markers in hASMCs treated with or without  $\beta$ -HB for 24 h in a dose dependent manner. n = 3.

(I) DCFDA/H2DCFDA cellular reactive oxygen species (ROS) assay to measure total ROS level, stimulated by hydrogen peroxide ( $H_2O_2$ , 150  $\mu$ M) with or without  $\beta$ -HB treatment (4 mM). NS, non-significant.

(J) Equation to calculate doubling time of HUVECs.

Data are presented as mean  $\pm$  standard error of mean (SEM). NS, non-significant; Ctrl, control.

**Figure S2 (related to Figure 2).**

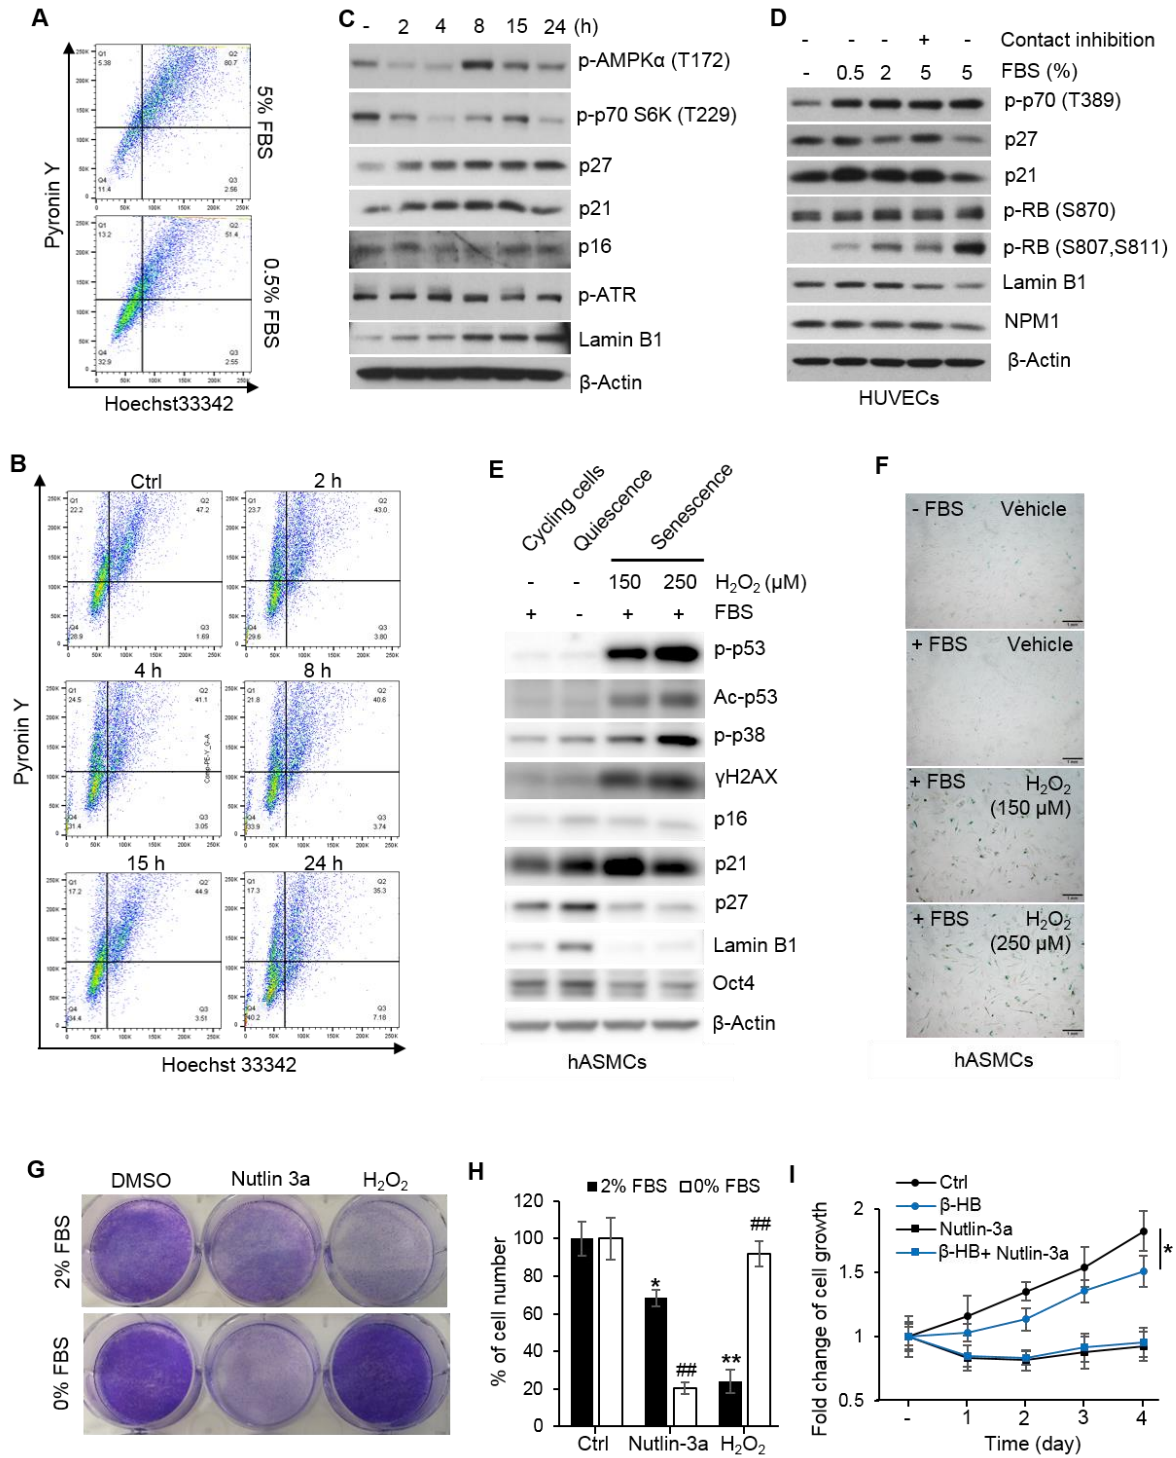

**Supplemental Figure 2 (related to Figure 2). Induction of cellular quiescence in HUVECs by  $\beta$ -HB treatment.**

(A) Cell cycle distribution of quiescent HUVECs (G0 phase) cultured with nutrient complete (5% FBS, EGF, bovine brain extract) or FBS-deprived media (0.5% FBS, EGF, bovine brain extract), assessed by flow cytometry analysis of the intercalation of Pyronin Y and Hoechst 33342. Each samples were analyzed based on 10,000 cells.

(B) Cell cycle distribution of HUVECs with time-dependent treatment of  $\beta$ -HB (2 h-24 h), assessed by flow cytometry analysis of the intercalation of Pyronin Y and Hoechst 33342. Samples were analyzed based on 10,000 cells.

(C) Representative Western blots for quiescence- or senescence-associated signaling proteins (p-AMPK $\alpha$ , p-p70 S6K, p27, p21, p16, p-ATR and Lamin B1) in HUVECs treated with  $\beta$ -HB (4 mM) in a time-dependent manner. n = 3.

(D) Representative Western blots for quiescence markers (p-p70, p27, p21, p-RB, Lamin B1 and NPM1), which were induced by contact inhibition or FBS deprivation in HUVECs. n = 3.

(E) Representative Western blots for quiescence (p27, Lamin B1 and Oct4) and senescence markers (p-p53, Ac-p53, p-p38,  $\gamma$ H2AX, p16 and p21) in hASMCs. FBS deprivation-induced quiescent cells and H<sub>2</sub>O<sub>2</sub> (150-250  $\mu$ M, 24 h)-stimulated senescent cells were compared to cycling cells. n = 3.

(F) Representative images of SA  $\beta$ -gal activity assay in hASMCs, cultured with FBS deprivation (24 h) or H<sub>2</sub>O<sub>2</sub> (150-250  $\mu$ M, 24 h) treatment. n = 3.

(G) Representative images of crystal violet staining to exhibit the number of HUVECs after Nutlin-3a or H<sub>2</sub>O<sub>2</sub> treatment in different conditioned media (2% FBS or 0% FBS). n = 3.

(H) Quantitation of Figure S2G. \*p < 0.05, \*\*p < 0.01 control vs. Nutlin-3a or H<sub>2</sub>O<sub>2</sub>, ###p < 0.01 2% FBS vs. 0% FBS, n = 3.

(I) Growth rate of HUVECs was analyzed by counting cell numbers every days after treating  $\beta$ -HB and Nutlin-3a. n = 3, \*p < 0.05 control (4 days) vs.  $\beta$ -HB (4 days).

Data are presented as mean  $\pm$  standard error of mean (SEM).

**Figure S3 (related to Figure 3).**

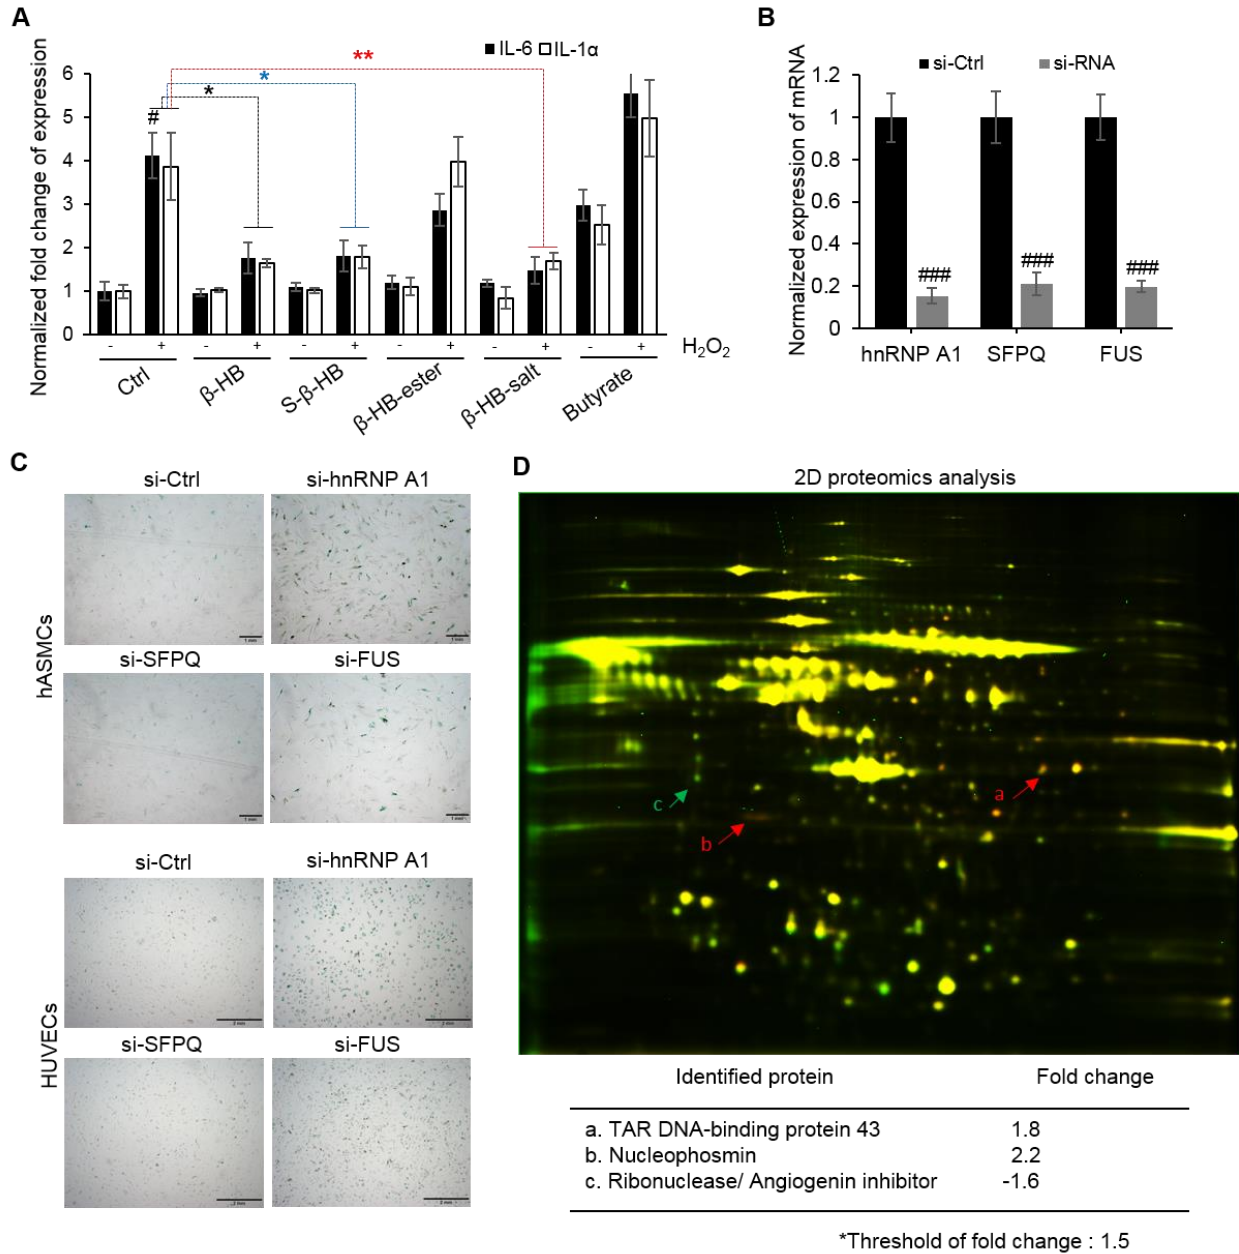

**Supplemental Figure 3 (related to Figure 3). Proteomics approach identifying the target protein of  $\beta$ -HB.**

(A) Quantitative real-time PCR (qRT-PCR) analysis of IL-6 and IL-1 $\alpha$ .  $\beta$ -HB or  $\beta$ -HB analogues (S- $\beta$ -HB,  $\beta$ -HB-ester,  $\beta$ -HB-salt and Butyrate) was added to HUVECs culture with or without H<sub>2</sub>O<sub>2</sub> (150  $\mu$ M, 24 h) stimulation. n = 3, #p < 0.05 vehicle vs. H<sub>2</sub>O<sub>2</sub>, \*p < 0.05, \*\*p < 0.01 control (Ctrl) + H<sub>2</sub>O<sub>2</sub> vs. treated group + H<sub>2</sub>O<sub>2</sub>.

(B) qRT-PCR analysis of hnRNP A1, SFPQ and FUS after silencing each genes to validate silencing efficiency respectively. n = 3, ###p < 0.01 si-Ctrl vs. si-RNA.

(C) Representative images of SA  $\beta$ -gal activity assay in hASMCs or HUVECs after silencing hnRNP A1, SFPQ, or FUS. n = 3.

(D) Comparative 2D-DIGE (Difference gel electrophoresis) analysis of HUVECs treated with  $\beta$ -HB (4 mM) for 2 days. Control lysate was labeled with Cy3 (green) dye and  $\beta$ -HB treated lysate with Cy5 (red) dye. Spots were picked and analyzed using MALDI-TOF mass analysis.

Data are presented as mean  $\pm$  standard error of mean (SEM).

**Figure S4 (related to Figure 4).**

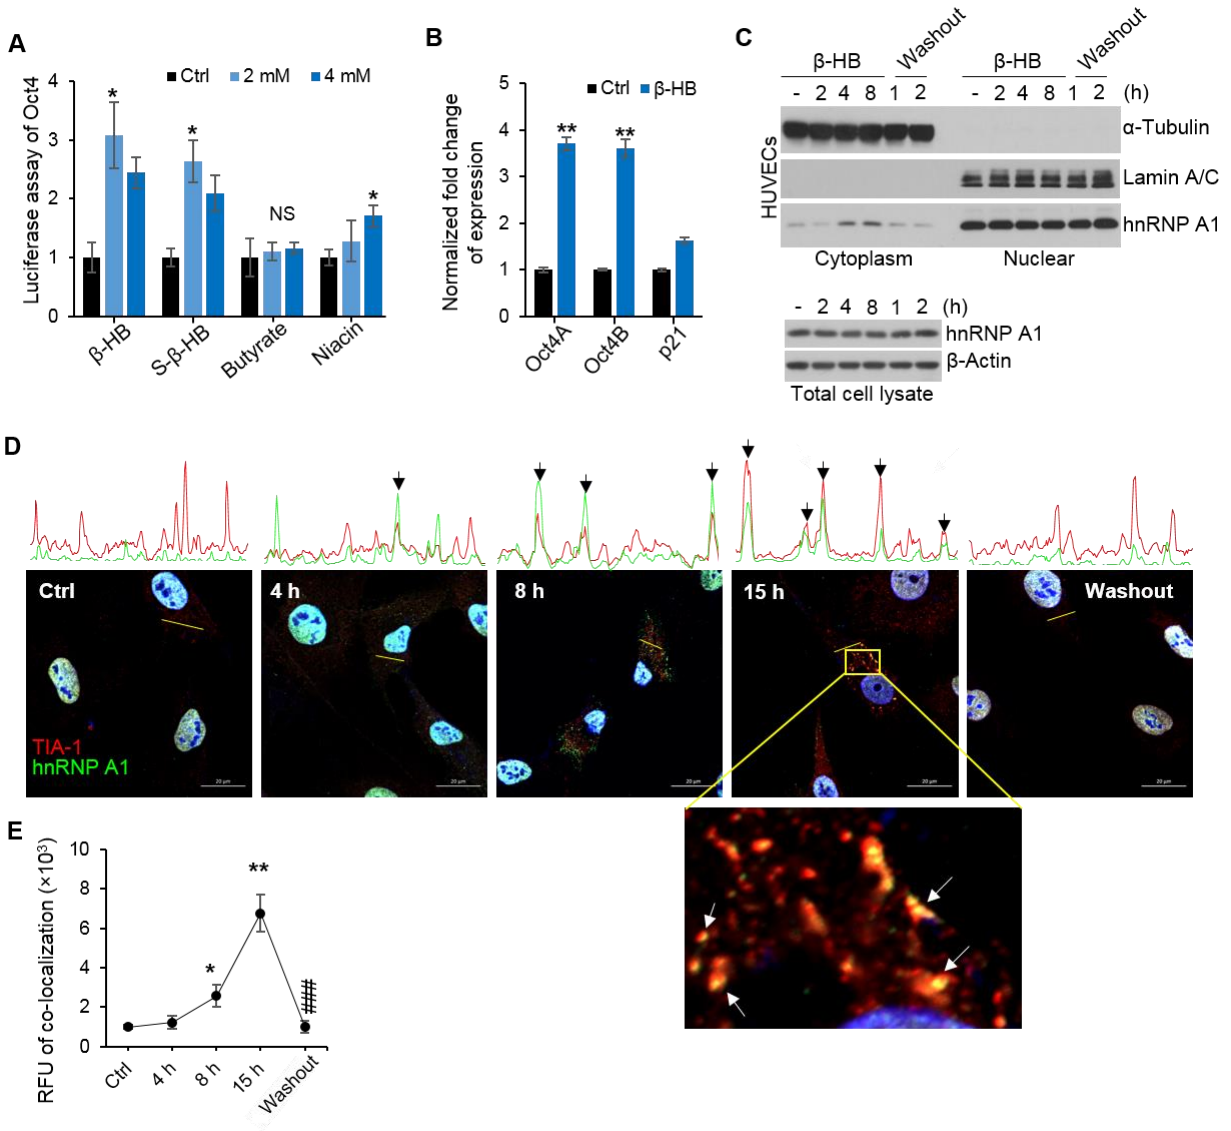



**Supplemental Figure 4 (related to Figure 4). hnRNP A1-mediated stabilization of Oct4 mRNA in response to  $\beta$ -HB.**

(A) Luciferase assay for Oct4 transcriptional activity in HUVECs treated with  $\beta$ -HB, S- $\beta$ -HB, Butyrate, or Niacin, which have structural similarity with  $\beta$ -HB. n = 3. \*p < 0.05 control vs. treated group. NS, non-significant.

(B) qRT-PCR analysis of Oct4A, Oct4B, and p21 in HUVECs treated with  $\beta$ -HB (4 mM, 15 h). n = 3, \*\*p < 0.01 control (Ctrl) vs.  $\beta$ -HB.

(C) Representative Western blots for subcellular localization of hnRNP A1. Upper panel represents localization of hnRNP A1 in cytoplasm and nuclear fraction of HUVECs with  $\beta$ -HB treatment (4 mM). Lower panel represents total level of hnRNP A1 after  $\beta$ -HB treatment for indicated time periods. n = 3.

(D) Representative images of immunofluorescence staining of hnRNP A1 (green) and TIA-1 (red) after  $\beta$ -HB treatment (4 mM) at indicated time points. Linear trajectories (yellow line) crossing the cell with the two signals were presented on the top of images. Arrows indicate colocalization of TIA-1 and hnRNP A1. n = 3, Scale bar, 20  $\mu$ m.

(E) Quantification of TIA-1 and hnRNP A1 colocalization in Figure S4D. \*p < 0.05, \*\*p < 0.01 control vs.  $\beta$ -HB treatment. ###p < 0.01 15 h vs. Washout.

Data are presented as mean  $\pm$  standard error of mean (SEM).

**Figure S5 (related to Figure 5).**

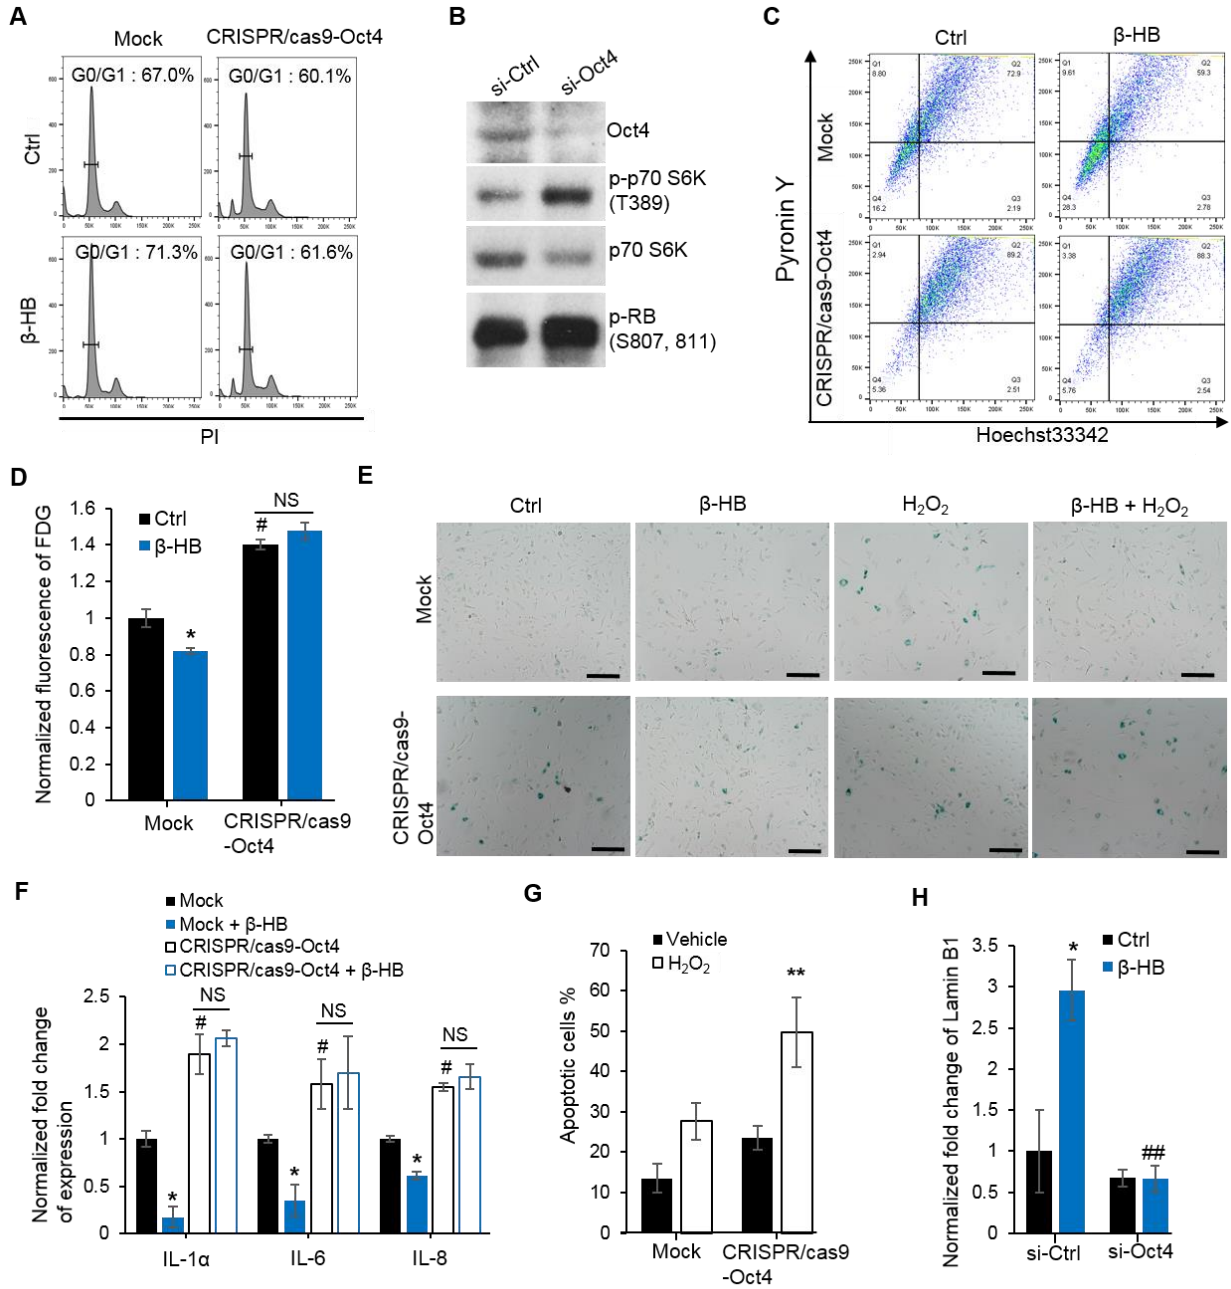

**Supplemental Figure 5 (related to Figure 5). Oct4 knockdown and ectopic expression in HUVECs.**

(A) Cell cycle distribution analysis of HUVECs, transfected with or without CRISPR/cas9-Oct4 plasmid to knockdown Oct4 gene expression. After transfection,  $\beta$ -HB (4 mM, 15 h) was treated to Mock and Oct4 knockdown group, then cells were assessed by flow cytometry analysis with PI staining. n = 3.

(B) Western blot analysis of Oct4, p-p70 S6K and p-RB in HUVECs after silencing Oct4 by siRNA.

(C) Cell cycle distribution of quiescent HUVECs (G0 phase) transfected with or without CRISPR/cas9-Oct4. After 2 days of transfection,  $\beta$ -HB (4 mM, 15 h) was added, then quiescent cells were assessed using flow cytometry based on 10,000 cells by staining of Pyronin Y and Hoechst 33342. n = 3.

(D) Fluorescein Di- $\beta$ -D-galactopyranoside (FDG) assay for quantification of senescence-associated  $\beta$ -galactosidase activity in Mock and Oct4 knockdown HUVECs, transfected with CRISPR/cas9-Oct4. Excitation /emission = 490 /514 (nm). n = 3. \*p < 0.05 control (Ctrl) vs.  $\beta$ -HB, #p < 0.05 Mock vs. CRISPR/cas9-Oct4.

(E) Representative images of SA  $\beta$ -gal assay in Mock and Oct4 knockdown HUVECs (CRISPR/cas9-Oct4), stimulated by H<sub>2</sub>O<sub>2</sub> (150  $\mu$ M, 15 h) with or without  $\beta$ -HB treatment (4 mM, 15 h), Scale bar, 100  $\mu$ m.

(F) q-RT PCR analysis of SASP (IL-1 $\alpha$ , IL-6 and IL-8) in Mock and Oct4 knockdown group of HUVECs, transfected with CRISPR/cas9-Oct4, and the comparison of  $\beta$ -HB treatment (4 mM, 15 h). \*p < 0.05 vehicle vs.  $\beta$ -HB, #p < 0.05 Mock vs. CRISPR/cas9-Oct4, NS, non-significant.

(G) Quantitative analysis of Figure 5F. \*\*p < 0.01 vehicle vs. H<sub>2</sub>O<sub>2</sub>. n = 3.

(H) qRT-PCR analysis of Lamin B1 in HUVECs. After silencing Oct4 by siRNA,  $\beta$ -HB (4 mM, 15 h) was added to control siRNA-treated or Oct4-silenced cells. n = 3, \*p < 0.05 control (Ctrl) vs.  $\beta$ -HB, ##p < 0.01 si-Ctrl +  $\beta$ -HB vs. si-Oct4 +  $\beta$ -HB.

Data are presented as mean  $\pm$  standard error of mean (SEM). NS, non-significant; Ctrl, control; si-Ctrl, control si-RNA.

**Figure S6 (related to Figure 6).**

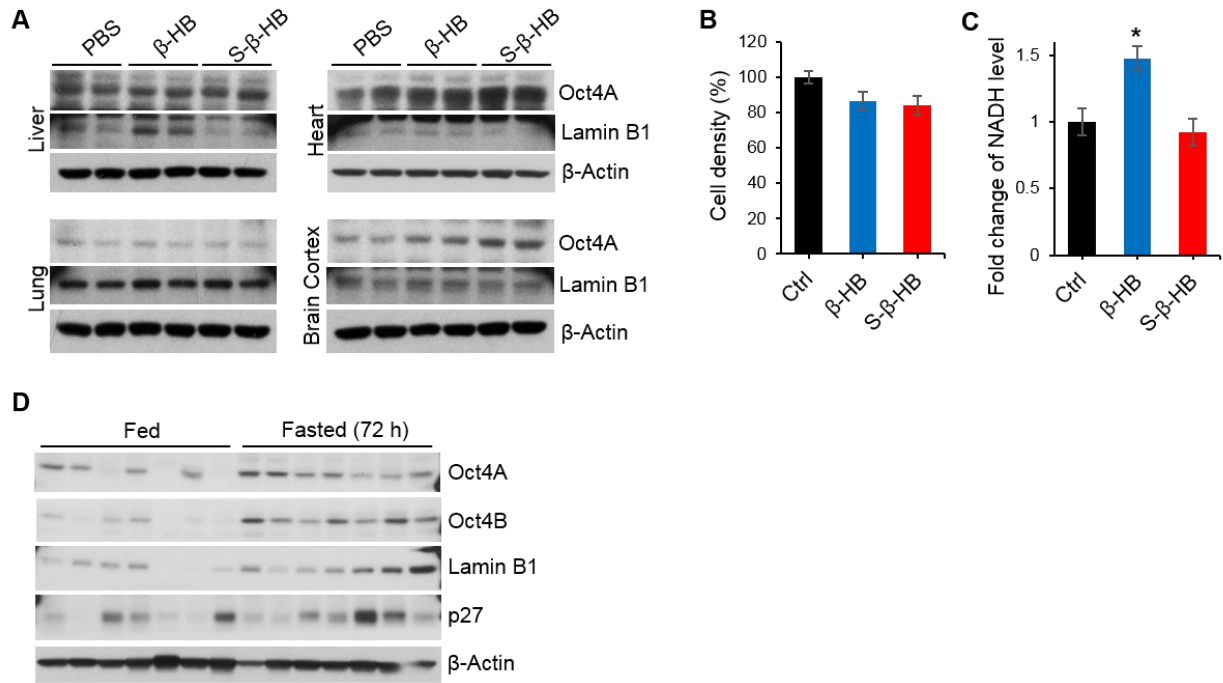

**Supplemental Figure 6 (related to Figure 6). Oct4A upregulation in vascular tissues by  $\beta$ -HB injection or fasting.**

(A) Western blot analysis of Oct4A and Lamin B1 in C57BL/6J mice organs (Liver, Lung, Heart and Brain Cortex) after intraperitoneal injection with PBS,  $\beta$ -HB salt (1.5 g/kg) and S- $\beta$ -HB (1.5 g/kg) dissolved in PBS. n = 6 mice/group.

(B) Cell density analysis of HUVECs treated with  $\beta$ -HB (4 mM, 24 h) or S- $\beta$ -HB (4 mM, 24 h). Cells were stained with cristal violet solution to measure the cell density on the plate. n = 3, non-significant.

(C) WST-8 assay to measure NADH level produced by mitochondria in HUVECs treated with  $\beta$ -HB (4 mM, 24 h) and S- $\beta$ -HB (4 mM, 24 h). n = 3, \*p < 0.05 control (Ctrl) vs.  $\beta$ -HB.

(D) Western blot analysis of Oct4A, Oct4B, Lamin B1 and p27 in fed or fasted mice (72 h). n = 7 mice/group.

Data are presented as mean  $\pm$  standard error of mean (SEM).

**Figure S7 (related to Figure 7).**

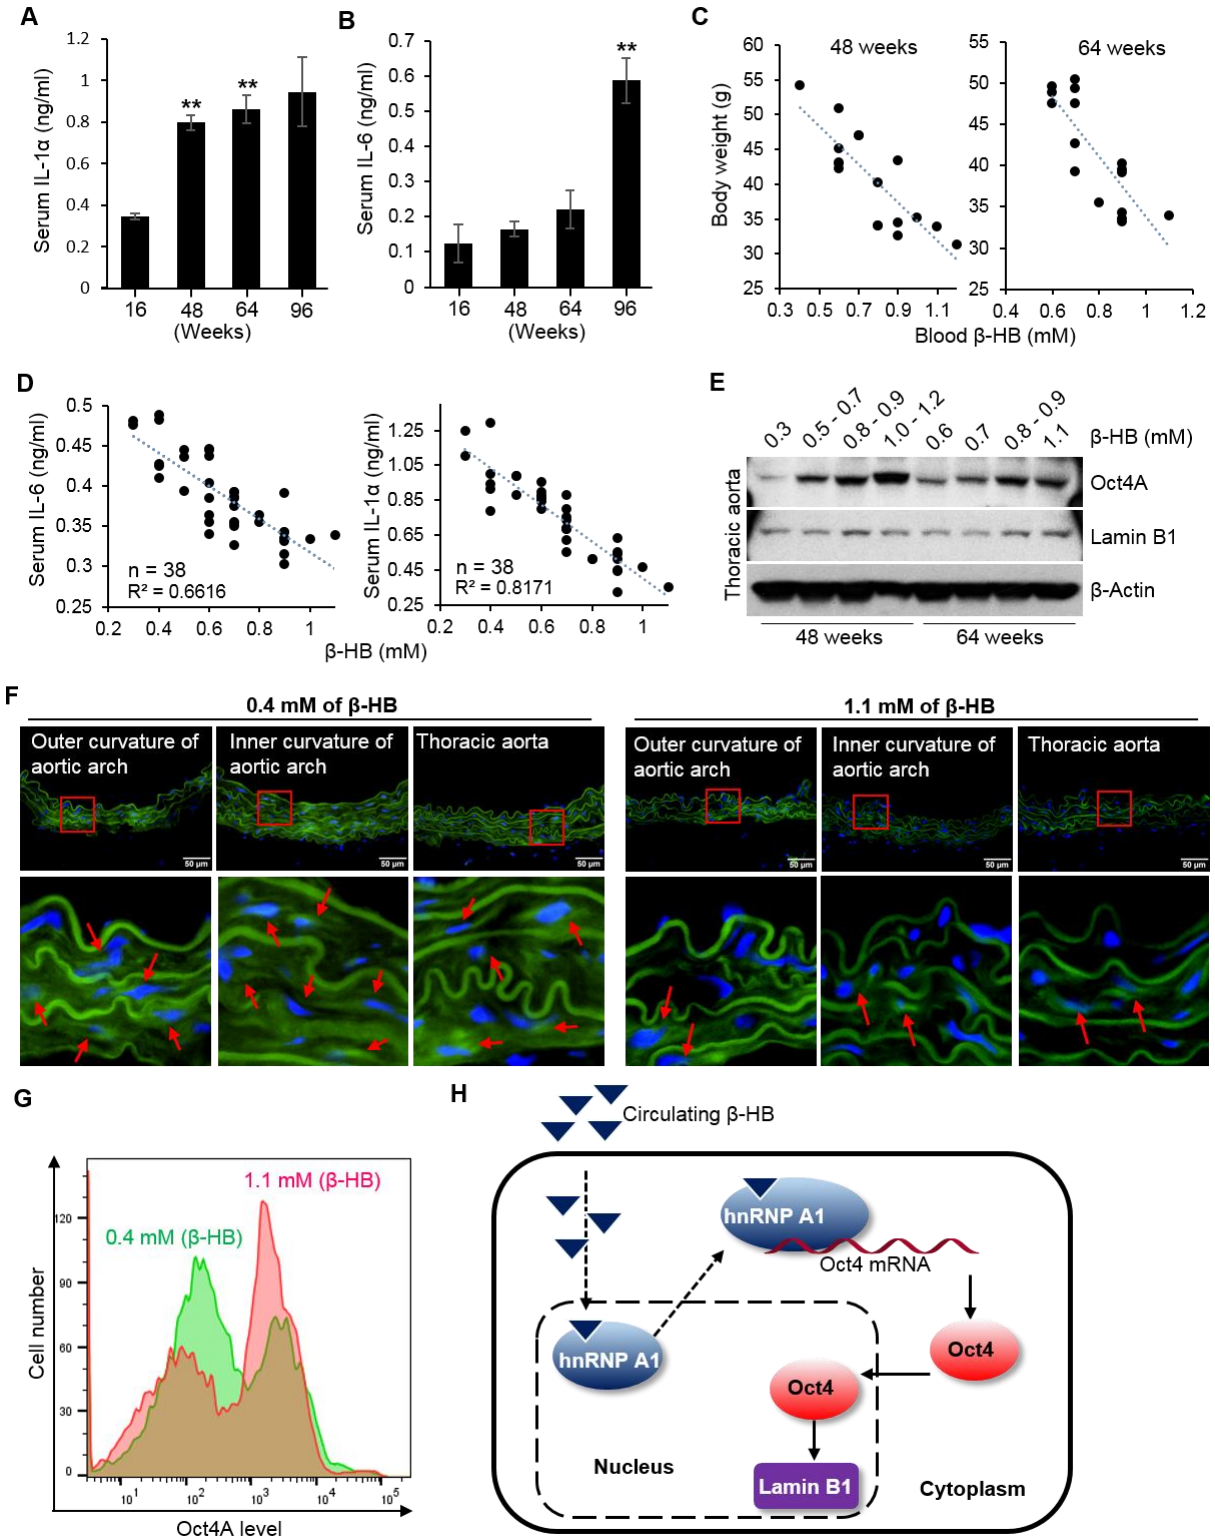

**Supplemental Figure 7 (related to Figure 7). Negative correlation of senescence and circulating  $\beta$ -HB.**

(A) Enzyme-linked immunosorbent assay (ELISA) to measure IL-1 $\alpha$  in the different aged-mice. (n = 6-10 mice per group), \*\*p < 0.01 16 weeks-old vs. 48 weeks- and 64 weeks-old.

(B) ELISA assay to measure IL-6 in the different aged-mice. (n = 6-10 mice per group), \*\*p < 0.01 16 weeks-old vs. 96 weeks-old.

(C) Negative correlation of body weight and blood  $\beta$ -HB concentration in 48-week-old (n = 14, R<sup>2</sup> = 0.6794) and 64-week-old (n = 16, R<sup>2</sup> = 0.6779) mice.

(D) ELISA showed negative correlations of  $\beta$ -HB with IL-6 (R<sup>2</sup> = 0.6616) and IL-1 $\alpha$  (R<sup>2</sup> = 0.8171) in aged C57BL/6J mice (80 weeks old, n = 38).

(E) Western blotting analyses of Oct4A and Lamin B1 in thoracic aorta from middle-aged C57BL/6J mice (48 and 64 weeks old, n = 12 mice/group) stratified by blood  $\beta$ -HB level.

(F) Fluorogenic  $\beta$ -gal activity assays of aged mice aorta (inner and outer curvatures of arch and thoracic aorta). Mice were grouped according to blood  $\beta$ -HB level (0.4 and 1.1 mM), then SPiDer  $\beta$ -gal assays was performed to evaluate the site-specific effect of blood  $\beta$ -HB. Red arrow indicates SA  $\beta$ -gal positive cells. n = 5 mice/group

(G) Flow cytometry analysis of mouse primary aortic smooth muscle cells. Aortic smooth muscle cells were isolated from mice stratified by blood  $\beta$ -HB concentration (1.1 mM and 0.4 mM), then fixed and stained with Oct4 antibody.

(H) Schematic summary showing hnRNP A1/ $\beta$ -HB-mediated Oct4 upregulation.

Data are presented as mean  $\pm$  standard error of mean (SEM).
